# 1 **Evaluation of SNP-based genotyping to monitor tuberculosis control in a high** 2 **MDR-TB setting**

3  
4 N Tukvadze<sup>1</sup>, I Bergval<sup>2</sup>, N Bablishvili<sup>1</sup>, N Bzekalava<sup>1</sup>, ARJ Schuitema<sup>2</sup>, J de Beer<sup>3</sup>, R de  
5 Zwaan<sup>3</sup>, S Alba<sup>2</sup>, D van Soolingen<sup>3</sup>, R Aspindzelashvili<sup>1</sup>, RM Anthony<sup>2</sup>, S Sengstake<sup>2#</sup>

6  
7 <sup>1</sup>National TB Reference Laboratory, National Center for Tuberculosis and Lung Diseases, 50  
8 Maruashvili Street, 0101 Tbilisi, Georgia

9  
10 <sup>2</sup>KIT, KIT Biomedical Research, Meibergdreef 39, 1105 AZ Amsterdam, The Netherlands

11  
12 <sup>3</sup>Mycobacteria Diagnostic Laboratory for Bacteriology and Parasitology (BPD) Center for  
13 Infectious Disease Research, Diagnostics and Perinatal Screening (IDS) National Institute  
14 for Public Health and the Environment (RIVM) P.O. Box 1, 3720 BA Bilthoven, The  
15 Netherlands

16  
17 Running title: Linking *Mtb* lineage to Tx history and MDR

18  
19 #Corresponding author

20  
21 Mailing address: Sarah Sengstake, KIT Biomedical Research, Meibergdreef 39,  
22 1105 AZ Amsterdam, The Netherlands

23 E-mail: sarah.sengstake@gmail.com

24 Telephone: +31 (0)20 5665454

25 Fax: +31 (0)20 6971841

## 26 **ABSTRACT**

27

28 *Mycobacterium tuberculosis* (*Mtb*) lineage identification and typing of clinical isolates in  
 29 general is performed only retrospectively. The results are rarely linked to drug susceptibility  
 30 testing (DST) or patient data. Consequently, the association between *Mtb* lineage,  
 31 (multi)drug resistance and treatment history is not fully explored at the local level. Here we  
 32 evaluated a new SNP based typing assay. We furthermore assessed the added value of  
 33 genotyping of *Mtb* isolates for epidemiological purposes and guidance of tuberculosis (TB)  
 34 control. *Mtb* lineage, DST profile and treatment history were determined for 399 samples at  
 35 the National TB Reference Laboratory (NRL) in Tbilisi, Georgia by local staff. Data was  
 36 shared electronically and analysis was performed remotely. Out of 399 isolates, 74 (74/399,  
 37 18.5%) were at least multidrug resistant (MDR)-TB, of which 63 (63/74, 85.1%) were  
 38 members of three different *Mtb* Beijing lineages. Previous treatment was reported in 38/74  
 39 (51.4%) MDR(+) patients. The availability of this data allows associations with lineages.  
 40 Notably, multidrug resistant TB was more strongly associated with the Beijing lineage than  
 41 treatment history. Of all MDR-TB Beijing strains 56.7% (42/74) were members of a genetic  
 42 cluster. This is most easily explained by (ongoing) MDR-TB transmission rather than drug  
 43 resistance amplification. This knowledge is useful when designing intervention strategies for  
 44 MDR-TB. Our study provides an example that on-site integrated *Mtb* genotyping is realistic  
 45 and could support TB control activities.

46

## 47 INTRODUCTION

48

49 The WHO has approved a post-2015 Global End Tuberculosis Strategy for tuberculosis (TB)  
50 prevention, care and control (1). Countries need to respond by adapting and enhancing their  
51 TB control activities (1, 2). Justifying investment in effective TB control strategies in a  
52 country can be achieved in part by defining and monitoring the (MDR) TB epidemic to  
53 identify appropriate interventions.

54

55 Molecular tools can positively impact on earlier detection of *Mtb* and identification of drug  
56 resistance (3, 4). Genotyping of *Mtb* isolates has revealed associations between drug  
57 resistance and *Mtb* lineage (5-8), identified routes of transmission (9, 10) and described the  
58 dynamics of epidemic clones (3, 11-14). Further developments in multiplex assays as well as  
59 the expanded use of next generation sequencing assays will increasingly allow *Mtb* strains  
60 to be simultaneously screened for resistance associated mutations and the bacterial lineage  
61 they represent.

62

63 A robust link has been found between previous treatment for TB and multidrug resistance  
64 (15), and is identified as a risk factor for MDR-TB by the WHO (16) but other factors are also  
65 important, for example the bacterial lineage. This is especially true when transmission of  
66 resistant strains is more common than the acquisition of resistance during treatment.  
67 Members of the East Asia lineage (*Mtb* lineage 2) (17, 18) have repeatedly been associated  
68 with multidrug resistance in high burden MDR-TB countries (11, 19) but less so in low  
69 burden (MDR)-TB countries (20-22). The relative importance and interdependence of these  
70 factors for infection control has received comparatively little attention.

71

72 Georgia is a high burden MDR-TB country with 17.7% MDR-TB and 3.3% extensively drug  
73 resistant (XDR)-TB reported in 2013 (23). Georgia's geographical setting between Eastern  
74 Europe, Russia and East-Asia is reflected in the genetic diversity of circulating *Mtb* strains  
75 (5, 24). Prior to this study there was no local capacity in Georgia to routinely and  
76 prospectively identify, document or monitor the genotypes of isolated *Mtb* strains. Previous  
77 studies have shown that in Georgia the Beijing lineage is associated with multidrug  
78 resistance (5, 24, 25).

79

80 Here, we evaluated the performance of a SNP-based molecular assay for *Mtb* genotyping  
81 and especially its practicality and value when linked to patient data and phenotypic DST at  
82 the NRL in Tbilisi, Georgia. The combined data provide an insight into the dynamics of  
83 infection and the feasibility of genotyping as a routine component of a national TB reference  
84 laboratory. Our data suggest that monitoring and interrupting the spread of Beijing genotype  
85 MDR-TB clones is of the utmost importance. Strengthening TB infection control by ongoing

86 monitoring of the circulating genotypes can provide data to support continued investment in  
87 these activities.

88

## 89 **MATERIAL and METHODS**

### 90 **Patient material**

91 Between August 2012 and April 2013, 30.5% of all well grown diagnostic cultures from  
92 individual pulmonary TB patients (a total of 399 samples) were randomly selected each  
93 month (approximately 40 per month) for analysis at the National TB Reference Laboratory in  
94 Tbilisi, Georgia. Patient samples included those from patients administered directly at the  
95 NCTLD in Tbilisi and also from the nine country-wide microscopic centers.

96 Informed consent was not required as the patient information used was anonymized before  
97 linking to the results of the analysis of the bacterial cultures and could not be linked back to  
98 individual patients.

#### 99 *Patient data*

100 Anonymized patient data (age, patient treatment status, patient outcome, DST, molecular  
101 resistance testing) were extracted from the patient database at the NRL and communicated  
102 to the KIT for further analysis.

#### 103 *DNA extraction*

104 DNA was extracted on site at the NRL in Tbilisi by thermolysis and sonication according to  
105 the Genotype MTBDR*plus* protocol (Hain, Nehren, Germany).

106

### 107 **MLPA assay**

108 A total of 399 DNA samples were analyzed by Multiplex Ligation-dependent Probe  
109 Amplification (MLPA) using xTAG technology on a MAGPIX™ device (Luminex BV, Austin,  
110 Texas, USA) as previously described (26, 27) in 10 runs in Tbilisi, by local laboratory staff  
111 after one week of onsite training. In each run eight or more of the cultures were from a  
112 sputum smear negative case. Data from each run was emailed in the form of a csv file for  
113 remote analysis.

114 MLPA profiles were assigned on the basis of the calculated values of previously published  
115 markers (24) and newly added validated MLPA oligos targeting the eisG-10A and eisG-14T  
116 mutation (eisG10-LPO 5'-CGTGGCCGCGGCATATGCCACAA-3' and eisG10-RPO 5'-  
117 TCGGATTCTGTGACTGTGACCCTGTGTAGCCCGACCGAGGACGACTGGCC-3'; eisG14-  
118 LPO 5'- TCAGGGTCACAGTCACAGAATCCGACTGTA-3' and eisG14-RPO 5'-  
119 GCATATGCCGCGGCCACGTGCACGTGAATATTACGACGACAGTGTCTGG-3').

120 Intermediate marker values for drug resistance targeting probes were interpreted as  
121 heteroresistance of the respective allele (28). Lineage identification by MLPA was performed  
122 by targeting lineage specific markers described previously (26).

123

## MLPA data analysis

Briefly all data obtained from the csv files of the individual MAGPIX runs received in Amsterdam were combined and analyzed in dedicated excel sheets as previously described (24). Intra-normalization was performed on the raw Median Fluorescence Intensity (MFI) signals followed by the application of marker-specific correction factors (24). The default range for intermediate values was defined between a corrected MFI of 330 – 590. After this analysis the average number of intermediate values per strain was just below 1 (0.80). Using the sigmoid curves generated from the data set to adjust the corrected MFI range the number of intermediate values per strain was further reduced to 0.35 ((24), Figure 2B). This data was linked to DST and patient information collected in Georgia. Any intermediate calls for drug resistance markers were regarded as resistant by MLPA and assumed to represent mixed genotypes.

## Phenotypic and molecular drug resistance detection

Phenotypic DST and GenotypeMTBDR*plus* (hereafter, MTBDR*plus*) were routinely performed by the staff at the NRL (3) and results were anonymized, documented in electronic data files and sent to the KIT.

## Sequencing

PCR amplification and sequencing of the *embB*, *gyrA* genes in selected isolates was performed to verify the MLPA results with the following primers: *gyrA* and *embB* (26) Sequencing of PCR products was performed by MacroGen Inc. (Amsterdam, The Netherlands).

## MIRU-VNTR typing

An optimized version (29) of the standard VNTR typing using 24 loci (30) was performed at the RIVM at the RIVM, Bilthoven, the Netherlands. Identification of MLVA 15-9 codes was carried out by using the MIRU-VNTR*plus* database (31). A cluster was defined as a minimum of two isolates with identical MIRU-VNTR patterns.

## Statistical analysis

Analysis of sensitivity, specificity, PPV and NPV of the MLPA in comparison to DST and the MTBDR*plus* assay was performed using GraphPadPrism version 5.03. The kappa coefficient was calculated using GraphPadPrismQuickCalcs (<http://www.graphpad.com/quickcalcs/>). Univariate and multivariate regression analysis was performed using STATA statistical software, Breda, The Netherlands.

## RESULTS

After initial automated MLPA data analysis (24), 43 of the 399 strains were not automatically assigned to a lineage and required expert review. After this process 388 (97.2%) of the samples were assigned to a single lineage; 32 after expert review. Of the remaining 11 strains, five remained uninterpretable and six were identified as having a mixed profile consistent with the presence of two lineages.

An overview of interpretable results obtained by each method (MLPA, DST, GenotypeMTBDR*plus*) is summarized in FIGURE 1. DST identified an MDR-TB phenotype in 74/399 (18.5%) patient samples (TABLE 1). Of these, eight (10.8%) strains were identified as XDR-TB.

DST and MTBDR*plus* confirmed 313 of 344 resistance associated mutations identified by MLPA, for 12 of the 344 MLPA detected mutations there was no valid data available by either DST or MTBDR*plus*. An intermediate marker value by MLPA was obtained for 28 (8.9%) of the 313 resistance MLPA calls. The 12 (3.8%) MLPA resistance calls not supported by DST or MTBDR*plus* all had intermediate values. Six of these 12 intermediate resistance calls were for RIF resistance associated mutations for which the MTBDR*plus* assay identified the wild type sequence only (data not shown). Tables showing sensitivity and specificity values for drug resistance detection by MLPA compared to DST (TABLE A1) and MTBDR*plus* assay (TABLE A2) are provided as supplementary information.

RIF resistance was conferred by the *rpoB*-531 mutation in more than half of all MDR-TB strains based on MTBDR*plus* (41/66; 62.1%) and MLPA (51/55; 96.4%) results (TABLE A3). MTBDR*plus* identified RIF resistance based on the loss of an *rpoB* wildtype probe in 15 isolates of which 14 were also RIF resistant by DST. In all 15 of these RIF resistant isolates (by MTBDR*plus*) MLPA identified INH resistance, but not RIF resistance. The concordance of the detection of MDR-TB between all methods is shown in FIGURE 2.

Eighty-two strains were screened for second line drug resistance by DST, including 74 M(X)DR-TB strains and eight selected on the basis of poor clinical response. Among these 82 strains eight (8/82, 9.6%) were resistant to KAN, and OFX by DST and were thus XDR-TB. Additionally, DST identified capreomycin resistance in four strains, one of which was also resistant to PAS. All 399 isolates were screened for second line drug resistance by MLPA (TABLE A4). MLPA detected OFX resistance in 17/399 isolates screened; the *gyrA*-A90V mutation in eight strains (six of which were OFX resistant by DST); the *gyrA*-D94G mutation in nine strains (eight of which were OFX resistant by DST). Sequencing of the *gyrA* gene was performed on one strain identified as XDR-TB by DST and MLPA and confirmed the presence of the *gyrA*-D94G mutation detected by MLPA. Sequencing showed that the two quinolone resistant strains identified by DST, but not by MLPA, did not carry a mutation

in *gyrA*. MLPA detected the *rrs*-1401 mutation associated with resistance to KAN/AMK/Capreomycin in 10 of the 399 isolates (three of which were XDR, and four MDR by DST). In one of the 399 isolates, strain 12-15893, MLPA detected a mutation in the *eis* gene, this strain was XDR by DST (TABLE A4).

Of the 394 (98.7%) strains with an interpretable MLPA profile, 248 (62.9%) were members of the Euro-American lineage (FIGURE 3). Of these 248 strains, 88 were further sub-classified as LAM (62/394; 15.7%), Haarlem (23/394; 5.8%), CAS (2/394; 0.5%), or X lineage (1/394; 0.2%). The second largest group was Beijing, 140/394 (35.5%) strains. MLPA subdivided the Beijing strains into Beijing K1 (95/394; 24.1%), Beijing V+/CHIN+ (43/394; 10.9%), Beijing SA-/CHIN-, or Beijing V- (1 and 1 each 0.3%). MLPA profiles of 6/394 (1.5%) samples showed the presence of multiple lineage markers assumed to represent mixed infections.

Combining the data above revealed 148/248 Euro-American strains (60%) were pan-susceptible by DST and 52/248 Euro-American strains (21%) were monoresistant to streptomycin (TABLE 2). Only 3.6% of the Euro-American strains (9/248) were MDR-TB (non XDR-TB) of which five were resistant to all tested first line drugs. In contrast 45% (63/140) of all Beijing strains identified were MDR-TB (eight XDR-TB) of which 43% (60/140) were resistant to all tested first line drugs by DST. Of the remaining Beijing strains 54 (54/140, 38%) were pan-susceptible, eight (8/140, 6%) were resistant only to streptomycin, and 15 (15/140, 11%) were resistant to INH and/or S and EMB (TABLE 2).

In this unselected set of isolates MDR-TB cases were detected in 36 of 289 (12.2%) new cases and 38 of 100 (38.0%) retreatment cases. These patient characteristics were considered with respect to resistance profile and *Mtb* lineage and correlations were analyzed using univariate and multivariate regression analysis (TABLE 3) and visualized in a Sankey diagram (FIGURE 4).

## DISCUSSION

Here we evaluated the feasibility, performance and potential information obtainable by introducing and performing a SNP-based molecular assay for genotyping *Mycobacterium tuberculosis* at the NRL of the NCTLD in Tbilisi, Georgia. SNP based characterization was possible for all but five of 399 isolates. Linking this data with the routine DST and patient information allowed an initial assessment of the dynamics of the TB epidemic in Georgia. There were striking differences between the risk of an MDR phenotype and specific *Mtb* lineages.

This study has limitations. Our samples size represents only approximately 10% of all notified TB cases for the year 2012 (23). The MLPA assay and the standard methods were



not performed on the same sample. In 68.2% (272/399) of all samples tested the MTBDR*plus* assay was performed directly on sputum whereas the MLPA assay was exclusively performed on cultured isolates. The MLPA assay was performed on site by the local laboratory staff for monitoring purposes at the end of the month and not as a routine tool such as the MTBDR*plus* assay which is performed on a daily basis. Minor problems were experienced, mainly related to the stability/functionality of the Luminex MAGPIX device but none of these prevented the assay from being performed always yielding good quality data. However the analysis and interpretation of the data required remote support. Either straight forward data analysis and interpretation or timely online support is a prerequisite for any molecular tool to be used in a routine diagnostic lab. Optimizing the use of data generated for real time monitoring rather than remote analysis is desirable.

The MLPA assay targets only the most common resistance associated mutations. For this reason it did not detect a proportion of RIF resistant strains detected by the reference standards. Accordingly, calling of an MDR-TB genotype by the MLPA alone lacked sensitivity. The currently MLPA cannot replace DST combined with line probe assays for clinical management, but sequence-based drug-resistance testing could conceivably achieve this (32, 33). However, a high specificity was obtained for the detection of M(X)DR-TB by MLPA. Of the eight XDR-TB strains identified by DST, resistance to AMK/KAN/capreomycin was identified in only half of the samples by MLPA. Mutations outside of the hot spot region of the *rrs* gene may account for the numbers of resistant phenotypes. Mutations in the *eis* gene have been associated with resistance to KAN (34-36). In this study MLPA identified a single isolate with an XDR phenotype that also carried a mutation in the *eis* gene and was a Beijing K1 strain.

Some of the discrepancies observed between the three methods of screening for drug resistance (FIGURE 2) may have been due to the presence of multiple resistance genotypes (37) a fact supported by the observation that a significant minority (9.8%) of the MLPA resistance calls were intermediate. The current study thus provides additional evidence supporting the interpretation of intermediate MLPA values for resistance associated mutations as described previously (24, 28). In this study, 43 intermediate values were obtained that could be compared to a reference standard. For 31 (72.1%) of these intermediate values resistance was detected by the reference standard. Thus intermediate MLPA values are highly suggestive of heteroresistance. Mixed resistance genotypes are often observed in high MDR settings (37). The relative contribution to mixed genotypes as a result of cross infection with resistant genotypes or resistance amplification deserves further study.

Association of resistance and patient characteristics to the genotypes: Of all M(X)DR-TB detected by DST 85% (63/74) were strains of the Beijing lineage. The MLPA is able to sub-delineate Beijing into five sub-lineages (26). Two Beijing sub-lineages (Beijing V+/CHIN+



and Beijing K1) accounted for 84% of all the MDR-TB identified. Additionally 29% (28/95) of all Beijing K1 lineage strains and 79% (34/43) of all Beijing V+/CHIN+ strains were MDR. All XDR-TB isolates identified were members of the Beijing lineage (Figure 4). MIRU-VNTR typing (TABLE A4) revealed that 18 of the 34 MDR-TB Beijing V+/CHIN+ strains belonged to the MLVA 15-9 type 100-32 and all 28 MDR-TB Beijing K1 strains belonged to the MLVA 15-9 type 94-32. Both 100-32 and 94-32 represent epidemic MDR-TB cluster types (11, 38) which have been previously identified in Georgia (24). The 100-32 cluster was formed exclusively by Beijing V+/CHIN+ lineage M(X)DR-TB strains, whereas the 94-32 cluster was formed by strains of the Beijing K1 and Beijing V+/CHIN+ lineage with various drug resistance profiles except streptomycin mono-resistance.

Although an MDR phenotype was associated with retreatment, *Mtb* lineage was much more strongly associated in this data set. After univariate analyses individuals infected with a Beijing strain had 20-fold higher odds (21.63, 95% CI 10.30 to 54.54) of being MDR-TB than individuals infected with a Euro-American strain; whereas retreatment patients had a 4-fold higher odds of being infected with an MDR-TB (4.59; 95% CI 2.68 to 7.68) (TABLE 3 and FIGURE 4). Multivariate analysis confirmed that the effects of Beijing strain and retreatment were independent (TABLE 3).

High *Mtb* cluster rates among previously hospitalized HIV patients co-infected with XDR-TB (10) and reported TB infection among hospital workers suggests nosocomial transmission as a main factor facilitating transmission of drug resistant strains. A high incidence of MDR-TB strains in penitentiary systems (39), transmission of these strains in the community through released inmates, prison staff and visitors (40) might also facilitate spread of MDR-TB strains in high burden MDR-TB countries.

Of all strains with any drug resistance identified by DST 32.0% (63/192) were streptomycin monoresistant. The Euro-American lineage was over represented in the streptomycin-monoresistant strains, 85.2% 52 out of 61 were from the Euro-American lineage. Of these 52 streptomycin monoresistant isolates 13 (25%) belonged to the MLVA 15-9 type 769-15. This MIRU type was identified in Georgia and named Georgia H37Rv-like (5, 24); indicating that a proportion of the ancestors of the circulating Euro-American strains "witnessed" streptomycin and their progeny are still circulating.

Rapid molecular testing has been recently shown to significantly decrease the time to initiation of appropriate MDR-TB treatment in Georgia (3, 4). Synthesis of the bacterial lineage data with available DST and patient characteristics here strikingly demonstrated that multidrug resistance is significantly more associated with the Beijing lineage than a previous history of TB treatment in Georgia. To objectively measure the relative contribution of cross

infection versus resistance amplification in diverse settings we suggest that the ratio of risk of MDR-TB associated with retreatment versus bacterial lineage is an interesting metric which could be used to express the contribution of resistance generation vs transmission, and should be further explored.

Combining resistance and genotyping data with patient characteristics will become increasingly practical to implement. A combined approach of spatial and molecular with classical epidemiology to study the transmission of (MDR)-TB has been shown to be feasible in Georgia. Infection control as well as treatment and patient management could benefit from additional knowledge of the infecting *Mtb* lineages (41, 42) and aid the identification of outbreak strains that might otherwise be missed (43). Most strikingly in this pilot implementation, when the genotyping patient data and susceptibility data were combined it was observed that a patient infected with a Beijing strain had 20-fold higher odds of being MDR-TB than a patient infected with a Euro-American strain. Interestingly a retreatment case of TB had “only” a 4-fold higher odds of being MDR-TB than a primary case. Monitoring these associations could help to understand the local transmission dynamics and identify areas where resources should be targeted. TB control programs can directly use genotyping data, and in the future WGS data, to rationally develop, adapt and prioritize infection control efforts but only if it is rapidly integrated with patient and bacteriological data: Such a goal is becoming increasingly necessary but also realistic.

# **Acknowledgments**

The TB-MLPA as described in the text is commercially available as the TB-SNPID assay, distributed via Beamedex, Orsay, France ([www.beamedex.com](http://www.beamedex.com)). KIT BR has a financial interest in the assay.

# **Funding information**

This work was funded by the Dutch government through the Netherlands Organisation for Health Research and Development (ZonMw) and the WOTRO Science for Global Development programme, project nr 205100005. The funders had no role in the study design, data collection and analysis, decision to publish or manuscript preparation.

# **Supplemental files**

TABLE A1. Performance parameters of the MLPA detecting molecular resistance to first and second line drugs compared to conventional DST as the reference standard.

TABLE A2. Performance parameters of the MLPA detecting molecular resistance to INH and RIF compared to GenotypeMTBDRplus as the reference standard.

TABLE A3. Correlation between drug resistance identified by MLPA and MTBDRplus.

TABLE A4. Results obtained for drug resistance for all 399 isolates by sputum microscopy, DST for first line and second line drugs, GenotypeMTBDRplus, MLPA and MIRU-VNTR.

## Tables and Figures

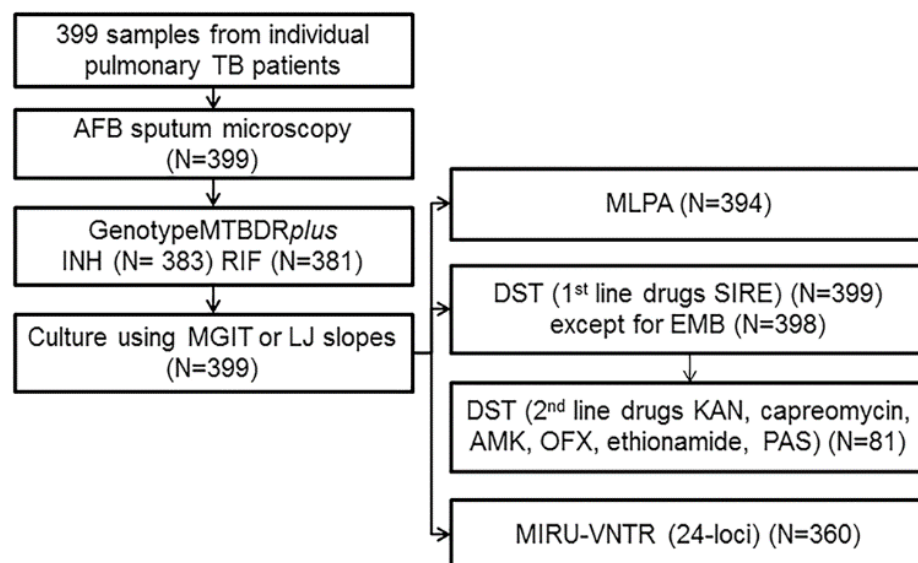

**FIGURE 1. Overview of interpretable results obtained by each method.** STR= streptomycin, INH= isoniazid, RIF= rifampicin, EMB= ethambutol, KAN= kanamycin, CAM= capreomycin, AMK=amikacin, OFX= ofloxacin, ETH= ethionamide, PAS= para-aminosalicylic acid. DST for the first line drugs STR, INH, RIF and EMB and the second line drugs ETH, PAS, KAN, CAM and OFX was performed at the NRL as described elsewhere (3, 44). Molecular resistance testing and confirmation of *Mycobacterium tuberculosis* complex was performed directly on sputum samples and/or on cultures using the Genotype MTBDRplus assay (44, 45) at the NRL. 24-locus MIRU-VNTR typing (29) was performed either at the RIVM or by Genoscreen (Lille, France)). DST results for first line drugs resistance were obtained from all 399 isolates. DST for second line drug resistance was performed on 82 isolates, valid results were obtained for 81 isolates. Interpretable MLPA profiles were obtained from 394 (99.0%) strains. Using the MTBDRplus assay interpretable results for isoniazid and rifampicin resistance were obtained for 383/ 399 (96.2%) and 381/399 (95.7%) strains, respectively.

419

420

421

**TABLE 1** Baseline characteristics of all patients enrolled and drug resistance identified

|                                 | n (%)      |
|---------------------------------|------------|
| Total                           | 399        |
| Sex                             |            |
| - Male                          | 300 (75)   |
| Age, years, median [IQR]        | 38 [27-50] |
| AFB microscopy                  |            |
| -negative                       | 80         |
| - 1+                            | 138        |
| - 2+                            | 91         |
| - 3+                            | 51         |
| - 4+                            | 39         |
| Case definitions                |            |
| -New                            | 298 (75)   |
| -previously treated             | 100 (25)   |
| -undefined                      | 1          |
| <b>Drug Resistance (by DST)</b> |            |
| - pan-susceptible TB            | 207 (52)   |
| - poly-TB                       | 118 (30)   |
| - INH monoresistance            | 22 (8)     |
| - MDR-TB                        | 74 (18)    |
| - new                           | 36         |
| - previously treated            | 38         |
| - XDR-TB                        | 8          |

Drug resistance identified on the basis of DST.  
MDR-TB = multidrug resistant; XDR-TB= extensively drug resistant; IQR = interquartile range

422

423

424

425

426

427

428

429

430

431

432

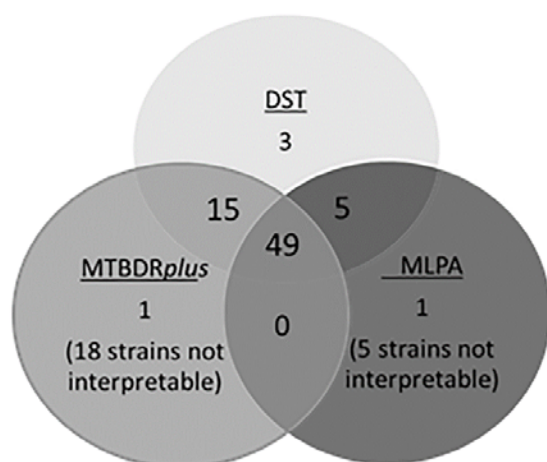

**FIGURE 2. Concordance between all methods used to determine MDR-TB.** For the comparison results from all methods obtained for all 399 strains were used. Numbers indicate strains identified by a single method or by multiple methods (overlapping circles).

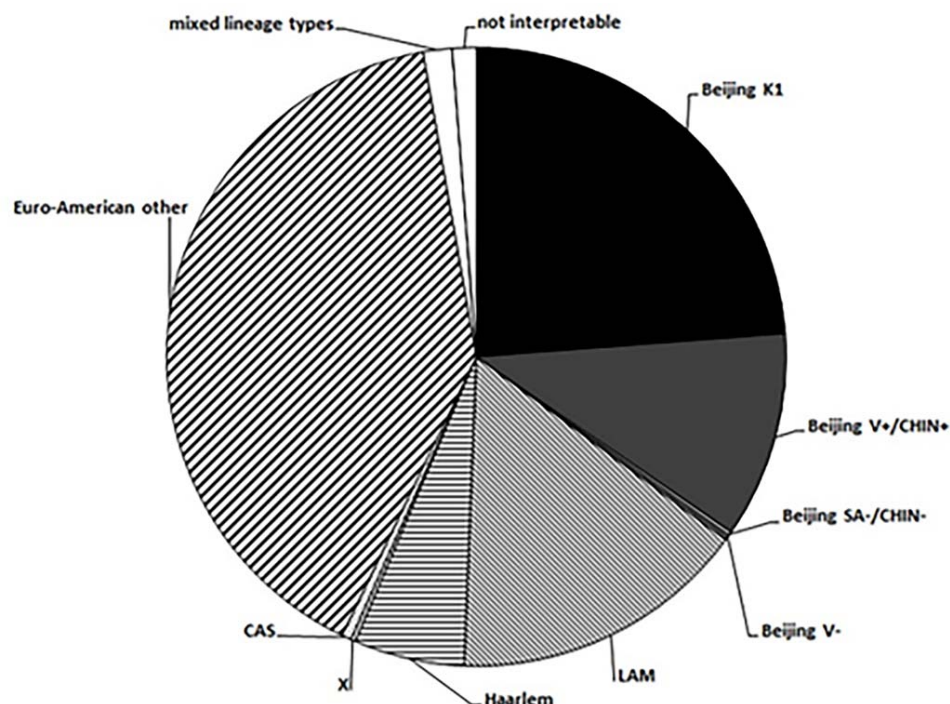

**FIGURE 3. Mycobacterium tuberculosis lineage diversity in 399 cultured clinical isolates from pulmonary TB patients in Tbilisi, Georgia between 2012-2013.** Beijing lineage (solid): Beijing K1 lineage (n= 95), Beijing V+/CHIN+ (n=43), Beijing SA-/CHIN- (n=1), Beijing V- (n=1); Euro-American lineage (patterned): LAM (n= 62), Haarlem (n= 23), X lineage (n= 1), CAS (n= 2), Euro-American other (n= 160); Mixed lineage types/ not interpretable (white): mixed lineage types (n=6), not interpretable (n=5).



474

**TABLE 2** MLPA lineage profiles for 399 Georgian isolates stratified according to their DST profile.

| Lineage type by MLPA         | (% of total) | Drug Susceptibility Testing, SIRE |       |       |        |        |         |       |                  |
|------------------------------|--------------|-----------------------------------|-------|-------|--------|--------|---------|-------|------------------|
|                              |              | RRRR                              | RRRS  | SRRS  | RRSS   | SRSS   | RSSS    | RRSR  | SSSS             |
| Total Beijing (n=140)        | 35.1         | 60 (43)                           | 2 (1) | 1 (1) | 7 (5)  | 4 (3)  | 8 (6)   | 4     | 54 (38)          |
| Beijing K1 (n=95)            | 23.8         | 27                                |       | 1     | 2      | 4      | 7       | 3     | 51               |
| Beijing V+/CHIN+ (n=43)      | 10.7         | 32                                | 2     |       | 5      |        | 1       | 1     | 2                |
| Beijing SA-/CHIN- (n=1)      | 0.0          |                                   |       |       |        |        |         |       | 1                |
| Beijing V- (n=1)             | 0.0          | 1                                 |       |       |        |        |         |       |                  |
| Total Euro-American (n=248)  | 62.2         | 5 (2)                             | 4 (2) |       | 16 (6) | 18 (7) | 52 (21) | 2 (1) | 149 (60)         |
| LAM (n=62)                   | 15.5         | 1                                 | 1     |       | 5      | 7      | 6       |       | 41               |
| Haarlem (n=23)               | 5.7          | 2                                 |       |       | 1      | 3      | 1       | 1     | 15               |
| X (n=1)                      | 0.0          |                                   |       |       |        |        |         |       | 1                |
| CAS (n=2)                    | 0.0          |                                   |       |       |        |        |         |       | 2                |
| Euro-American other (n=160)  | 40.1         | 2                                 | 3     |       | 10     | 8      | 45      | 1     | 90               |
| mixed lineage types (n=6)    | 1.5          |                                   | 1     |       |        |        | 1       |       | 4                |
| non-interpretable/ NTM (n=5) | 1.2          | 1                                 |       |       | 1      |        | 2       | 1     |                  |
| Total (N = 399)              | 100          | 66                                | 7     | 1     | 24     | 22     | 63      | 7     | 207 <sup>a</sup> |

SIRE = streptomycin/ isoniazid/ rifampicin/ ethambutol. a, for one strain the DST result for EMB was not reported (SSSX); SRSR: one Euro-American other isolate; SSSR: one LAM isolate. Numbers in brackets indicate percentages of drug resistance within one MTB lineage.

475

476

477

478

479

480

481

482

483

484

485

486

487

488

489

490

491

**TABLE 3** Estimated effect of patient and strain characteristics on the odds of a TB patient having MDR-TB (logistic regression)

| Variables                                | n   | univariate analysis    |                      | multivariate analysis (n=387) |         |
|------------------------------------------|-----|------------------------|----------------------|-------------------------------|---------|
|                                          |     | OR (95% CI)            | p-value <sup>a</sup> | OR (95% CI)                   | p-value |
| Age                                      | 393 | 0.98 (0.97 to 1.01)    | 0.222                |                               |         |
| Male                                     | 392 | 1.02 (0.57 to 1.87)    | 0.940                |                               |         |
| Strain (vs. Euro-American <sup>b</sup> ) | 387 |                        | <0.001               |                               | <0.001  |
| Beijing                                  |     | 21.63 (10.30 to 45.54) | <0.001               | 20.12 (9.41 to 43.04)         | <0.001  |
| Treatment history (vs. new)              | 392 |                        |                      |                               |         |
| Retreatment                              |     | 4.59 (2.68 to 7.86)    | <0.001               | 3.95 (2.08 to 7.54)           | <0.001  |

(a) Wald test of association for individual odds ratio (OR), log likelihood ratio test for overall test of significance (categorical variables); (b) including Haarlem/LAM/CAS/X lineage and Euro-American other.

492

493

494

495

496

497

498

499

500

501

502

503

504

505

506

507

508

509

510

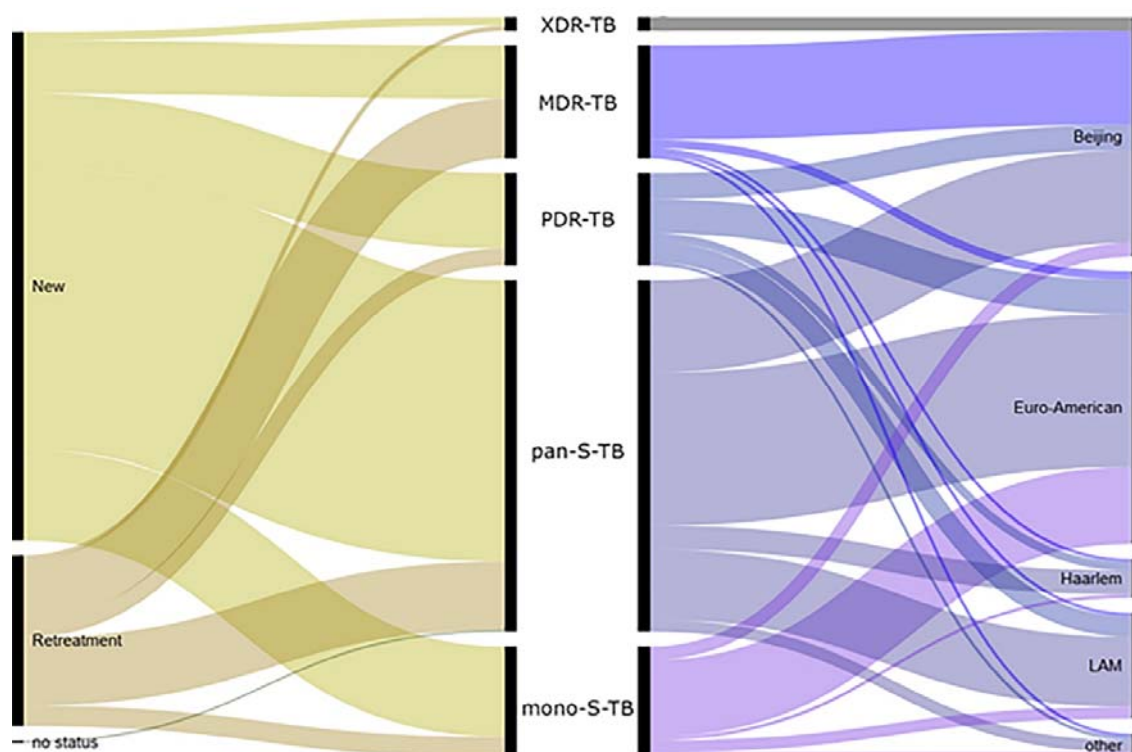

**FIGURE 4.** Sankey diagram showing the relationships between treatment history, drug susceptibility results and *Mtb* lineage of all 399 samples tested by DST and MLPA. XDR-TB are exclusively from the Beijing lineage, MDR-TB are overrepresented in the Beijing lineage (85% Beijing), 38% of retreatment cases were MDR-TB. New (n=298), Retreatment (n=100), no status (n=1); XDR-TB (n=8), MDR-TB (n=66), polydrug-resistant (PDR)-TB (n=54), pan-susceptible (pan-S)-TB (n=206), mono-STR (mono-S)-TB (n=63) and other (n=2); Beijing (n=140), Euro-American (n=160), Haarlem (n=23), LAM (n=62), Other (n=6, suspected mixed strains) and (n=5, not interpretable) and (n=2, CAS lineage) and (n=1, X lineage). The Sankey diagram was designed with the webtool RAW (<http://app.raw.densitydesign.org/>).

- 529 1. **WHO.** 2015. WHO End TB Strategy ([http://www.who.int/tb/post2015\\_strategy/en/](http://www.who.int/tb/post2015_strategy/en/))  
530 Accessed 3 February 2016.
- 531 2. **van der Werf MJ, Antoine D.** 2015. Progressing towards tuberculosis elimination in  
532 the European Union and European Economic Area. *Euro Surveill* **20**.
- 533 3. **Tukvadze N, Kempker RR, Kalandadze I, Kurbatova E, Leonard MK,**  
534 **Apsindzelashvili R, Bablishvili N, Kipiani M, Blumberg HM.** 2012. Use of a molecular  
535 diagnostic test in AFB smear positive tuberculosis suspects greatly reduces time to detection  
536 of multidrug resistant tuberculosis. *PLoS One* **7**:e31563.
- 537 4. **Kipiani M, Mirtskhulava V, Tukvadze N, Magee M, Blumberg HM, Kempker RR.**  
538 2014. Significant clinical impact of a rapid molecular diagnostic test (Genotype MTBDRplus  
539 assay) to detect multidrug-resistant tuberculosis. *Clin Infect Dis* **59**:1559-1566.
- 540 5. **Niemann S, Diel R, Khechinashvili G, Gegia M, Mdivani N, Tang YW.** 2010.  
541 *Mycobacterium tuberculosis* Beijing lineage favors the spread of multidrug-resistant  
542 tuberculosis in the Republic of Georgia. *J Clin Microbiol* **48**:3544-3550.
- 543 6. **Ezati N, Lukoye D, Wampande EM, Musisi K, Kasule GW, Cobelens FG, Kateete**  
544 **DP, Joloba ML.** 2014. The *Mycobacterium tuberculosis* Uganda II family and resistance to  
545 first-line anti-tuberculosis drugs in Uganda. *BMC Infect Dis* **14**:703.
- 546 7. **Dalla Costa ER, Lazzarini LC, Perizzolo PF, Diaz CA, Spies FS, Costa LL,**  
547 **Ribeiro AW, Barroco C, Schuh SJ, da Silva Pereira MA, Dias CF, Gomes HM, Unis G,**  
548 **Zaha A, Almeida da Silva PE, Suffys PN, Rossetti ML.** 2013. *Mycobacterium tuberculosis*  
549 of the RDRio genotype is the predominant cause of tuberculosis and associated with  
550 multidrug resistance in Porto Alegre City, South Brazil. *J Clin Microbiol* **51**:1071-1077.
- 551 8. **Skiba Y, Mokrousov I, Ismagulova G, Maltseva E, Yurkevich N, Bismilda V,**  
552 **Chingissova L, Abildaev T, Aitkhozhina N.** 2015. Molecular snapshot of *Mycobacterium*  
553 *tuberculosis* population in Kazakhstan: A country-wide study. *Tuberculosis (Edinb)*  
554 doi:10.1016/j.tube.2015.04.012.
- 555 9. **Sacchi FP, Praca RM, Tatara MB, Simonsen V, Ferrazoli L, Croda MG, Suffys**  
556 **PN, Ko AI, Andrews JR, Croda J.** 2015. Prisons as reservoir for community transmission of  
557 tuberculosis, Brazil. *Emerg Infect Dis* **21**:452-455.
- 558 10. **Gandhi NR, Weissman D, Moodley P, Ramathal M, Elson I, Kreiswirth BN,**  
559 **Mathema B, Shashkina E, Rothenberg R, Moll AP, Friedland G, Sturm AW, Shah NS.**  
560 2013. Nosocomial transmission of extensively drug-resistant tuberculosis in a rural hospital  
561 in South Africa. *J Infect Dis* **207**:9-17.
- 562 11. **Merker M, Blin C, Mona S, Duforet-Frebourg N, Lecher S, Willery E, Blum MG,**  
563 **Rusch-Gerdes S, Mokrousov I, Aleksic E, Allix-Beguec C, Antierens A,**  
564 **Augustynowicz-Kopec E, Ballif M, Barletta F, Beck HP, Barry CE, III, Bonnet M,**  
565 **Borroni E, Campos-Herrero I, Cirillo D, Cox H, Crowe S, Crudu V, Diel R, Drobniewski**  
566 **F, Fauville-Dufaux M, Gagneux S, Ghebremichael S, Hanekom M, Hoffner S, Jiao WW,**  
567 **Kalon S, Kohl TA, Kontsevaya I, Lillebaek T, Maeda S, Nikolayevskyy V, Rasmussen**  
568 **M, Rastogi N, Samper S, Sanchez-Padilla E, Savic B, Shamputa IC, Shen A, Sng LH,**  
569 **Stakenas P, Toit K, Varaine F, Vukovic D, Wahl C, Warren R, Supply P, Niemann S,**  
570 **Wirth T.** 2015. Evolutionary history and global spread of the *Mycobacterium tuberculosis*  
571 Beijing lineage. *Nat Genet* **47**:242-249.
- 572 12. **Mokrousov I.** 2013. Insights into the origin, emergence, and current spread of a  
573 successful Russian clone of *Mycobacterium tuberculosis*. *Clin Microbiol Rev* **26**:342-360.

- 574 13. **Cooke GS, Beaton RK, Lessells RJ, John L, Ashworth S, Kon OM, Williams OM,**  
575 **Supply P, Moodley P, Pym AS.** 2011. International spread of MDR TB from Tugela Ferry,  
576 South Africa. *Emerg Infect Dis* **17**:2035-2037.
- 577 14. **Perez-Lago L, Herranz M, Comas I, Ruiz-Serrano MJ, Lopez Roa P, Bouza E,**  
578 **Garcia-de-Viedma D.** 2015. Ultra-fast assessment of the presence of a high-risk  
579 *Mycobacterium tuberculosis* strain in a population. *J Clin Microbiol* doi:10.1128/JCM.02851-  
580 15.
- 581 15. **Gunther G, van LF, Alexandru S, Altet N, Avsar K, Bang D, Barbuta R,**  
582 **Bothamley G, Ciobanu A, Crudu V, Davilovits M, Dedicoat M, Duarte R, Gualano G,**  
583 **Kunst H, de LW, Leimane V, Magis-Escurra C, McLaughlin AM, Muylle I, Polcova V,**  
584 **Pontali E, Popa C, Rumetshofer R, Skrahina A, Solodovnikova V, Spinu V, Tiberi S,**  
585 **Viikklepp P, Lange C.** 2015. Multidrug-resistant tuberculosis in Europe, 2010-2011. *Emerg*  
586 *Infect Dis* **21**:409-416.
- 587 16. **WHO.** 2010. Guidelines for treatment of tuberculosis  
588 <http://www.who.int/tb/publications/2010/9789241547833/en/> Accessed 3 February 2016.
- 589 17. **Hershberg R, Lipatov M, Small PM, Sheffer H, Niemann S, Homolka S, Roach**  
590 **JC, Kremer K, Petrov DA, Feldman MW, Gagneux S.** 2008. High functional diversity in  
591 *Mycobacterium tuberculosis* driven by genetic drift and human demography. *PLoS Biol* **6**.
- 592 18. **Comas I, Homolka S, Niemann S, Gagneux S.** 2009. Genotyping of genetically  
593 monomorphic bacteria: DNA sequencing in *Mycobacterium tuberculosis* highlights the  
594 limitations of current methodologies. *PLoS One* **4**.
- 595 19. **Glynn JR, Whiteley J, Bifani PJ, Kremer K, van Soolingen D.** 2002. Worldwide  
596 occurrence of Beijing/W strains of *Mycobacterium tuberculosis*: a systematic review. *Emerg*  
597 *Infect Dis* **8**:843-849.
- 598 20. **de Freitas FA, Bernardo V, Gomgnimbou MK, Sola C, Siqueira HR, Pereira MA,**  
599 **Fandinho FC, Gomes HM, Araujo ME, Suffys PN, Marques EA, Albano RM.** 2014.  
600 Multidrug resistant *Mycobacterium tuberculosis*: a retrospective katG and rpoB mutation  
601 profile analysis in isolates from a reference center in Brazil. *PLoS One* **9**:e104100.
- 602 21. **Martins MC, Giampaglia CM, Oliveira RS, Simonsen V, Latrilha FO, Moniz LL,**  
603 **Couvin D, Rastogi N, Ferrazoli L.** 2013. Population structure and circulating genotypes of  
604 drug-sensitive and drug-resistant *Mycobacterium tuberculosis* clinical isolates in Sao Paulo  
605 state, Brazil. *Infect Genet Evol* **14**:39-45.
- 606 22. **Lukoye D, Katabazi FA, Musisi K, Kateete DP, Asiimwe BB, Okee M, Joloba ML,**  
607 **Cobelens FG.** 2014. The T2 *Mycobacterium tuberculosis* genotype, predominant in  
608 Kampala, Uganda, shows negative correlation with antituberculosis drug resistance.  
609 *Antimicrob Agents Chemother* **58**:3853-3859.
- 610 23. **ECDC.** 2015. Tuberculosis surveillance and monitoring in Europe 2015  
611 ([ecdc.europa.eu/en/publications/Publications/tuberculosis-surveillance-monitoring-Europe-](http://ecdc.europa.eu/en/publications/Publications/tuberculosis-surveillance-monitoring-Europe-2015.pdf)  
612 [2015.pdf](http://ecdc.europa.eu/en/publications/Publications/tuberculosis-surveillance-monitoring-Europe-2015.pdf)). Accessed 3 February 2016.
- 613 24. **Sengstake S, Bablishvili N, Schuitema A, Bzekalava N, Abadia E, de Beer J,**  
614 **Tadumadze N, Akhalaia M, Tuin K, Tukvadze N, Aspindzelashvili R, Bachiyska E,**  
615 **Panaiotov S, Sola C, van Soolingen D, Klatser P, Anthony R, Bergval I.** 2014.  
616 Optimizing multiplex SNP-based data analysis for genotyping of *Mycobacterium tuberculosis*  
617 isolates. *BMC Genomics* **15**:572.
- 618 25. **Pardini M, Niemann S, Varaine F, Iona E, Meacci F, Orru G, Yesilkaya H, Jarosz**  
619 **T, Andrew P, Barer M, Checchi F, Rinder H, Orefici G, Rusch-Gerdes S, Fattorini L,**

- 620 **Oggioni MR, Bonnet M.** 2009. Characteristics of drug-resistant tuberculosis in Abkhazia  
621 (Georgia), a high-prevalence area in Eastern Europe. *Tuberculosis (Edinb)* **89**:317-324.
- 622 26. **Bergval I, Sengstake S, Brankova N, Levterova V, Abadia E, Tadumaze N,**  
623 **Bablshvili N, Akhalaia M, Tuin K, Schuitema A, Panaiotov S, Bachiyska E, Kantardjiev**  
624 **T, de ZR, Schurch A, van SD, van 't HA, Cobelens F, Aspindzelashvili R, Sola C,**  
625 **Klatser P, Anthony R.** 2012. Combined species identification, genotyping, and drug  
626 resistance detection of *Mycobacterium tuberculosis* cultures by MLPA on a bead-based  
627 array. *PLoS One* **7**.
- 628 27. **Bergval IL, Vijzelaar RN, Dalla Costa ER, Schuitema AR, Oskam L, Kritski AL,**  
629 **Klatser PR, Anthony RM.** 2008. Development of multiplex assay for rapid characterization  
630 of *Mycobacterium tuberculosis*. *J Clin Microbiol* **46**:689-699.
- 631 28. **Chaidir L, Sengstake S, de Beer J, Krismawati H, Lestari FD, Ayawaila S, van**  
632 **SD, Anthony R, van CR, Alisjahbana B.** 2015. *Mycobacterium tuberculosis* genotypic drug  
633 resistance patterns and clustering in Jayapura, Papua, Indonesia. *Int J Tuberc Lung Dis*  
634 **19**:428-433.
- 635 29. **de Beer JL, Akkerman OW, Schurch AC, Mulder A, van der Werf TS, van der**  
636 **Zanden AG, van IJ, van SD.** 2014. Optimization of Standard In-House 24-Locus Variable-  
637 Number Tandem-Repeat Typing for *Mycobacterium tuberculosis* and Its Direct Application to  
638 Clinical Material. *J Clin Microbiol* **52**:1338-1342.
- 639 30. **Supply P, Lesjean S, Savine E, Kremer K, van Soolingen D, Locht C.** 2001.  
640 Automated high-throughput genotyping for study of global epidemiology of *Mycobacterium*  
641 *tuberculosis* based on mycobacterial interspersed repetitive units. *J Clin Microbiol* **39**:3563-  
642 3571.
- 643 31. **Allix-Beguec C, Harmsen D, Weniger T, Supply P, Niemann S.** 2008. Evaluation  
644 and strategy for use of MIRU-VNTRplus, a multifunctional database for online analysis of  
645 genotyping data and phylogenetic identification of *Mycobacterium tuberculosis* complex  
646 isolates. *J Clin Microbiol* **46**:2692-2699.
- 647 32. **Walker TM, Kohl TA, Omar SV, Hedge J, Del Ojo Elias C, Bradley P, Iqbal Z,**  
648 **Feuerriegel S, Niehaus KE, Wilson DJ, Clifton DA, Kapatai G, Ip CL, Bowden R,**  
649 **Drobniewski FA, Allix-Beguec C, Gaudin C, Parkhill J, Diel R, Supply P, Crook DW,**  
650 **Smith EG, Walker AS, Ismail N, Niemann S, Peto TE, Modernizing Medical**  
651 **Microbiology (MMM) Informatics Group.** 2015. Whole-genome sequencing for prediction  
652 of *Mycobacterium tuberculosis* drug susceptibility and resistance: a retrospective cohort  
653 study. *Lancet Infect Dis* **15**:1193-1202.
- 654 33. **Coll F, McNerney R, Preston MD, Guerra-Assuncao JA, Warry A, Hill-Cawthorne**  
655 **G, Mallard K, Nair M, Miranda A, Alves A, Perdigao J, Viveiros M, Portugal I, Hasan Z,**  
656 **Hasan R, Glynn JR, Martin N, Pain A, Clark TG.** 2015. Rapid determination of anti-  
657 tuberculosis drug resistance from whole-genome sequences. *Genome Med* **7**:51.
- 658 34. **Zaunbrecher MA, Sikes RD, Jr., Metchock B, Shinnick TM, Posey JE.** 2009.  
659 Overexpression of the chromosomally encoded aminoglycoside acetyltransferase *eis*  
660 confers kanamycin resistance in *Mycobacterium tuberculosis*. *Proc Natl Acad Sci U S A*  
661 **106**:20004-20009.
- 662 35. **Georghiou SB, Magana M, Garfein RS, Catanzaro DG, Catanzaro A, Rodwell TC.**  
663 2012. Evaluation of genetic mutations associated with *Mycobacterium tuberculosis*  
664 resistance to amikacin, kanamycin and capreomycin: a systematic review. *PLoS One*  
665 **7**:e33275.
- 666 36. **Rodwell TC, Valafar F, Douglas J, Qian L, Garfein RS, Chawla A, Torres J,**  
667 **Zadorozhny V, Kim MS, Hoshide M, Catanzaro D, Jackson L, Lin G, Desmond E,**



- 668 **Rodrigues C, Eisenach K, Victor TC, Ismail N, Crudu V, Gler MT, Catanzaro A.** 2014.  
669 Predicting extensively drug-resistant Mycobacterium tuberculosis phenotypes with genetic  
670 mutations. *J Clin Microbiol* **52**:781-789.
- 671 37. **Streicher EM, Bergval I, Dheda K, Bottger EC, Gey van Pittius NC, Bosman M,**  
672 **Coetzee G, Anthony RM, van Helden PD, Victor TC, Warren RM.** 2012. Mycobacterium  
673 tuberculosis population structure determines the outcome of genetics-based second-line  
674 drug resistance testing. *Antimicrob Agents Chemother* **56**:2420-2427.
- 675 38. **Devaux I, Kremer K, Heersma H, van Soolingen D.** 2009. Clusters of multidrug-  
676 resistant Mycobacterium tuberculosis cases, Europe. *Emerg Infect Dis* **15**:1052-1060.
- 677 39. **Jenkins HE, Gegia M, Furin J, Kalandadze I, Nanava U, Chakhaia T, Cohen T.**  
678 2014. Geographical heterogeneity of multidrug-resistant tuberculosis in Georgia, January  
679 2009 to June 2011. *Euro Surveill* **19**.
- 680 40. **Dara M, Acosta CD, Melchers NV, Al-Darraj HA, Chorgoliani D, Reyes H, Centis**  
681 **R, Sotgiu G, D'Ambrosio L, Chadha SS, Migliori GB.** 2015. Tuberculosis control in  
682 prisons: current situation and research gaps. *Int J Infect Dis* **32**:111-117.
- 683 41. **Click ES, Winston CA, Oeltmann JE, Moonan PK, Mac Kenzie WR.** 2013.  
684 Association between Mycobacterium tuberculosis lineage and time to sputum culture  
685 conversion. *Int J Tuberc Lung Dis* **17**:878-884.
- 686 42. **den Hertog AL, Menting S, van Soolingen D, Anthony RM.** 2014. Mycobacterium  
687 tuberculosis Beijing genotype resistance to transient rifampin exposure. *Emerg Infect Dis*  
688 **20**:1932-1933.
- 689 43. **Sanchez-Padilla E, Merker M, Beckert P, Jochims F, Dlamini T, Kahn P, Bonnet**  
690 **M, Niemann S.** 2015. Detection of drug-resistant tuberculosis by Xpert MTB/RIF in  
691 Swaziland. *N Engl J Med* **372**:1181-1182.
- 692 44. **Tukvadze N, Bablishvili N, Apsindzelashvili R, Blumberg HM, Kempker RR.**  
693 2014. Performance of the MTBDRsl assay in Georgia. *Int J Tuberc Lung Dis* **18**:233-239.
- 694 45. **Shubladze N, Tadumadze N, Bablishvili N.** 2013. Molecular patterns of multidrug  
695 resistance of in Georgia. *Int J Mycobacteriol* **2**:73-78.

696
